# Supplementary material for: The Healthy Primary School of the Future: A Contextual Action-Oriented Research Approach
Source: PubMed Central journal article supplement (PMC6209969; doi:10.3390/ijerph15102243), 2018-10-12
Supplement: ijerph-15-02243-s001.pdf [file ijerph-15-02243-s001.pdf]

Additional file 1: Overview of the current 'fruit basket'

| <u>Aim</u>                                                        |                                       |                                                                                                                                                                                                                                                                                                                                                                                                                                                                                                                                                                                                                                                |                                                                                                                                                                                                                                                                                                                          |                                                                                                                                                                                                                                                                                                                                   |
|-------------------------------------------------------------------|---------------------------------------|------------------------------------------------------------------------------------------------------------------------------------------------------------------------------------------------------------------------------------------------------------------------------------------------------------------------------------------------------------------------------------------------------------------------------------------------------------------------------------------------------------------------------------------------------------------------------------------------------------------------------------------------|--------------------------------------------------------------------------------------------------------------------------------------------------------------------------------------------------------------------------------------------------------------------------------------------------------------------------|-----------------------------------------------------------------------------------------------------------------------------------------------------------------------------------------------------------------------------------------------------------------------------------------------------------------------------------|
| <b>Integrating health and well-being within the school system</b> |                                       | <p><b>General tips:</b></p> <ul style="list-style-type: none"> <li>• Always keep the fun-factor alive.</li> <li>• Involve school team, parents, and children in developing and implementing changes and assessing the needs, interests and opportunities by forming working groups and student councils.</li> <li>• Make use of the knowledge and experience of the partners in the project, such as employees of the Public Health Service.</li> <li>• Share good ideas and experiences.</li> <li>• Talk with children about health and well-being.</li> <li>• Set a good example for the children.</li> <li>• Evaluate regularly.</li> </ul> |                                                                                                                                                                                                                                                                                                                          |                                                                                                                                                                                                                                                                                                                                   |
| School aspect                                                     | Possible changes                      | Brief explanation                                                                                                                                                                                                                                                                                                                                                                                                                                                                                                                                                                                                                              | Websites (for more information and/or examples)                                                                                                                                                                                                                                                                          | Tips and other useful information                                                                                                                                                                                                                                                                                                 |
| Policy                                                            | Healthy school policy                 | Changing existing policy into healthy lifestyle stimulating policy.                                                                                                                                                                                                                                                                                                                                                                                                                                                                                                                                                                            | <a href="https://www.gezondeshoel.nl/primair-onderwijs/toolkit-gezonde-school">https://www.gezondeshoel.nl/primair-onderwijs/toolkit-gezonde-school</a>                                                                                                                                                                  | <ul style="list-style-type: none"> <li>- Possible issues for policy: lunch, snacks, drinks, energizers, and teaching about nutrition and exercise.</li> <li>- Collaborate with the child partners for comparable policies at pre-school and after-school care.</li> </ul>                                                         |
|                                                                   | Celebration policy                    | Developing a school policy on treats to celebrate the birthdays of children and teachers as a school.                                                                                                                                                                                                                                                                                                                                                                                                                                                                                                                                          | <a href="http://www.voedingscentrum.nl/Assets/Uploads/voedingscentrum/Documents/Consumenten/Mijn%20kind%20en%20ik/Naar%20school/Traktatieboekje.pdf">http://www.voedingscentrum.nl/Assets/Uploads/voedingscentrum/Documents/Consumenten/Mijn%20kind%20en%20ik/Naar%20school/Traktatieboekje.pdf</a>                      |                                                                                                                                                                                                                                                                                                                                   |
| Physical environment                                              | Physical activity friendly schoolyard | Changing the schoolyard to create a physical activity friendly environment.                                                                                                                                                                                                                                                                                                                                                                                                                                                                                                                                                                    | <a href="http://beheer.nisb.nl/cogito/modules/uploads/docs/64041399972677.pdf">http://beheer.nisb.nl/cogito/modules/uploads/docs/64041399972677.pdf</a>                                                                                                                                                                  | <ul style="list-style-type: none"> <li>- Mark the schoolyard with lines.</li> <li>- Teach children fun PA games to do in the schoolyard.</li> <li>- Make a schedule so that classes do not use the yard simultaneously.</li> <li>- Create for each class a materials box that fits the age and interests of the group.</li> </ul> |
|                                                                   | Water taps in school                  | Installing water taps in the school where children can refill their water bottles.                                                                                                                                                                                                                                                                                                                                                                                                                                                                                                                                                             | <a href="https://kraanwatergraag.nl/school/watertappunt/">https://kraanwatergraag.nl/school/watertappunt/</a><br><br><a href="https://www.ggdzl.nl/professionals/diensten/advisering/drankenbord-weet-jij-wat-je-drinkt/">https://www.ggdzl.nl/professionals/diensten/advisering/drankenbord-weet-jij-wat-je-drinkt/</a> |                                                                                                                                                                                                                                                                                                                                   |

|                           |                                                                         |                                                                                                                            |                                                                                                                                                                                                          |                                                                                                                                                                                                                                                                                                                |
|---------------------------|-------------------------------------------------------------------------|----------------------------------------------------------------------------------------------------------------------------|----------------------------------------------------------------------------------------------------------------------------------------------------------------------------------------------------------|----------------------------------------------------------------------------------------------------------------------------------------------------------------------------------------------------------------------------------------------------------------------------------------------------------------|
|                           | <b>School garden</b>                                                    | Create a school garden: children can learn and experience where food comes from and become more aware of nutrition.        | <a href="http://www.schooltuinproject.nl">www.schooltuinproject.nl</a>                                                                                                                                   | - Materials and educational lessons are available from the national school garden project.                                                                                                                                                                                                                     |
| <b>Social environment</b> | <i>'Taakspel'</i> programma (Task game programme)                       | A group-based approach in which children learn to comply with rules in the classroom.                                      | <a href="http://www.taakspel.nl/">http://www.taakspel.nl/</a>                                                                                                                                            | - The Task Game has been developed for grades 3 to 8. There is also Task Play in the playground, which enables primary schools to introduce rules for the playground.                                                                                                                                          |
| <b>School aspect</b>      | <b>Possible changes</b>                                                 | <b>Brief explanation</b>                                                                                                   | <b>Websites (for more information and/or examples)</b>                                                                                                                                                   | <b>Tips and other useful information</b>                                                                                                                                                                                                                                                                       |
| <b>Education</b>          | <i>'LekkerFit'</i> programma (Enjoy being fit programme)                | Healthy lifestyle education with physical activity and nutrition lessons as part of the curriculum. For all school grades. | <a href="http://www.lekkerfitopschool.nl">www.lekkerfitopschool.nl</a>                                                                                                                                   |                                                                                                                                                                                                                                                                                                                |
|                           | <i>'Op voeten en fietsen'</i> programma (By foot and by bike programme) | Inter-class competition focusing on active transport.                                                                      | <a href="http://vvn.nl/wat-wedoen/op-de-basisschool/">http://vvn.nl/wat-wedoen/op-de-basisschool/</a>                                                                                                    | - Investigate if a safe school route can be defined and whether the bicycle storage is large enough.<br>- Talk to the municipal authorities about the traffic rules around the school.                                                                                                                         |
|                           | <i>'Smaaklessen'</i> programma (Taste lessons programme)                | Practical food tasting lessons. For all school grades.                                                                     | <a href="http://www.smaaklessen.nl">www.smaaklessen.nl</a>                                                                                                                                               | - Fresh products must be purchased for each lesson.<br>- Lessons can be downloaded free of charge.                                                                                                                                                                                                             |
| <b>Classroom-based</b>    | <b>Energizers</b>                                                       | Introducing short breaks of physical activity during or between lessons.                                                   | <a href="https://www.101werkvoemen.nl/tag/energizer/">https://www.101werkvoemen.nl/tag/energizer/</a><br><a href="http://hopsports.com/wat-is-brain-breaks">http://hopsports.com/wat-is-brain-breaks</a> | - Wide range of books and PA cards can be purchased for inspiration and tips. In addition, many examples are available on the internet.<br>- Make clear arrangements with the class about the energizers (indicating when the energizer ends).<br>- The PA cards can also be used during breaks or taken home. |
|                           | <b>Daily Mile</b>                                                       | Walk or run a mile each day with                                                                                           | <a href="http://thedailymile.nl">http://thedailymile.nl</a>                                                                                                                                              | - Just give it a try!                                                                                                                                                                                                                                                                                          |

|                                             |                                                                                                                                                                                                                                                                                                                                                                                                                                                                                                                                                      |                                                                                               |                                                                                                                                                                                                           |                                                                                               |
|---------------------------------------------|------------------------------------------------------------------------------------------------------------------------------------------------------------------------------------------------------------------------------------------------------------------------------------------------------------------------------------------------------------------------------------------------------------------------------------------------------------------------------------------------------------------------------------------------------|-----------------------------------------------------------------------------------------------|-----------------------------------------------------------------------------------------------------------------------------------------------------------------------------------------------------------|-----------------------------------------------------------------------------------------------|
|                                             |                                                                                                                                                                                                                                                                                                                                                                                                                                                                                                                                                      | the class.                                                                                    |                                                                                                                                                                                                           | - Establish a clearly defined route for The Daily Mile.                                       |
| Physical education (PE)                     | Increase quantity                                                                                                                                                                                                                                                                                                                                                                                                                                                                                                                                    | At least 2 to 3 one-hour PE lessons a week.                                                   |                                                                                                                                                                                                           | - Ask how other schools schedule the 2 to 3 PE classes in a week.                             |
|                                             | Increase quality                                                                                                                                                                                                                                                                                                                                                                                                                                                                                                                                     | Increasing the intensity of PE lessons by using tips by Slingerland et al (32).               |                                                                                                                                                                                                           |                                                                                               |
|                                             | Swimming lessons                                                                                                                                                                                                                                                                                                                                                                                                                                                                                                                                     | Introducing swimming lessons.                                                                 |                                                                                                                                                                                                           |                                                                                               |
| Other PA stimulating changes                | Sport clubs                                                                                                                                                                                                                                                                                                                                                                                                                                                                                                                                          | Introducing lessons by sports clubs.                                                          | <a href="https://schoolsportvereniging.nl/index.html">https://schoolsportvereniging.nl/index.html</a>                                                                                                     | - Connect with organizations/people/sports clubs in the neighbourhood.                        |
|                                             | Physical activities after school                                                                                                                                                                                                                                                                                                                                                                                                                                                                                                                     | Creating PA activities after school.                                                          |                                                                                                                                                                                                           | - Also check the possibility of employing trainee sports teachers to guide the PA activities. |
|                                             | Natuursprong (Nature jump)                                                                                                                                                                                                                                                                                                                                                                                                                                                                                                                           | Programme giving children the opportunity to play and be physically active in nature.         | <a href="https://www.huisvoorbeeweging.nl/bewegenstimuleren/natuursprong/over-natuursprong/">https://www.huisvoorbeeweging.nl/bewegenstimuleren/natuursprong/over-natuursprong/</a>                       |                                                                                               |
| Other healthy nutrition stimulating changes | Kokkerelli (kids university for cooking)                                                                                                                                                                                                                                                                                                                                                                                                                                                                                                             | Children (grades 5-8) visit a farm to experience and learn about food production.             | <a href="http://www.kokkerelli.nl/kinderen/wie-zijn-we/">http://www.kokkerelli.nl/kinderen/wie-zijn-we/</a>                                                                                               |                                                                                               |
|                                             | SuperChefs                                                                                                                                                                                                                                                                                                                                                                                                                                                                                                                                           | Children (grades 7 and 8) learn to prepare healthy meals.                                     | <a href="http://www.voedingscentrum.nl/superchefs">www.voedingscentrum.nl/superchefs</a>                                                                                                                  |                                                                                               |
|                                             | SuperShopper                                                                                                                                                                                                                                                                                                                                                                                                                                                                                                                                         | Two lessons and a trip to a supermarket to learn about and experience making healthy choices. | <a href="http://www.voedingscentrum.nl/professionals/gezond-op-school/basisonderwijs/supershopper.aspx">http://www.voedingscentrum.nl/professionals/gezond-op-school/basisonderwijs/supershopper.aspx</a> |                                                                                               |
| School aspect                               | Possible changes                                                                                                                                                                                                                                                                                                                                                                                                                                                                                                                                     | Brief explanation                                                                             | Websites (for more information and/or examples)                                                                                                                                                           | Tips and other useful information                                                             |
| Parents                                     | <p><b>General tips:</b></p> <ul style="list-style-type: none"> <li>• Personalize: parents may have some knowledge or expertise they would like to share or use with the children.</li> <li>• Let children and their parents do things together.</li> <li>• Combine a parent meeting with something that involves their child, such as a play by the children or an exhibition of the children's creative works.</li> <li>• Set the children a homework assignment (on healthy behaviour) that they should do together with their parents.</li> </ul> |                                                                                               |                                                                                                                                                                                                           |                                                                                               |
|                                             | Goedkoop gezonde voeding (good food programme)                                                                                                                                                                                                                                                                                                                                                                                                                                                                                                       | This programme teaches adults to eat healthily even on a low budget.                          | <a href="http://goedkoopgezondevoeding.nl">http://goedkoopgezondevoeding.nl</a>                                                                                                                           |                                                                                               |

|  |                                                                                                     |                                                                                                                                                     |                                                                                                                                                                                                                                       |  |
|--|-----------------------------------------------------------------------------------------------------|-----------------------------------------------------------------------------------------------------------------------------------------------------|---------------------------------------------------------------------------------------------------------------------------------------------------------------------------------------------------------------------------------------|--|
|  | <b>E- learning on healthy lifestyles</b>                                                            | A free online course to give parents tips and tricks on how they can encourage their child to eat healthier food and become more physically active. | <a href="http://www.gezondeafsprakenmetjehkind.nl">www.gezondeafsprakenmetjehkind.nl</a>                                                                                                                                              |  |
|  | <b>Interactive theatre 'Voor je het weet, zijn ze groot'</b> (They are grown up before you know it) | An interactive theatre event providing parents with information and examples and discussing raising children, healthy nutrition and PA.             | <a href="http://www.voedingscentrum.nl/interactief-theater">http://www.voedingscentrum.nl/interactief-theater</a>                                                                                                                     |  |
|  | <b>Triple P meeting</b>                                                                             | A meeting to talk about and learn practical skills regarding difficulties of raising a child in a healthy way.                                      | <a href="http://www.triplep-nederland.nl/nl-nl/de-triple-p-methode/triple-p-toolbox/informatie-en-lezingen-niveau-2/">http://www.triplep-nederland.nl/nl-nl/de-triple-p-methode/triple-p-toolbox/informatie-en-lezingen-niveau-2/</a> |  |
|  | <b>Triple P online</b>                                                                              | Eight online sessions to learn strategies for raising a child in a healthy way.                                                                     | <a href="http://www.triplep-nederland.nl/nl-nl/de-triple-p-methode/triple-p-toolbox/triple-p-online/">http://www.triplep-nederland.nl/nl-nl/de-triple-p-methode/triple-p-toolbox/triple-p-online/</a>                                 |  |
